# Supplementary material for: Increased Expression of Lipid Metabolism Genes in Early Stages of Wooden Breast Links Myopathy of Broilers to Metabolic Syndrome in Humans
Source: PubMed Central journal article supplement (PMC6826700; doi:10.3390/genes10100746), 2019-09-25
Supplement: genes-10-00746-s001.pdf [file genes-10-00746-s001.pdf]

**Table S1.** Sequencing and mapping statistics for RNA-Sequencing of 8 wooden breast affected and 6 unaffected pectoralis major muscle samples. Sample 424183 was excluded from differential expression analysis due to an extreme outlier expression pattern.

| Sample | Affected/<br>Unaffected | Total Reads | Paired-end reads<br>after trimming | Mapped reads<br>(Gallus_gallus-5.0) | Mapped reads<br>(GRCg6a) |
|--------|-------------------------|-------------|------------------------------------|-------------------------------------|--------------------------|
| 424132 | Unaffected              | 16,115,674  | 16,109,441                         | 12,373,514                          | 12,451,896               |
| 424170 | Unaffected              | 22,690,579  | 22,681,762                         | 15,695,351                          | 15,802,383               |
| 424183 | Unaffected              | 19,863,892  | 19,856,809                         | 15,109,341                          | 15,140,824               |
| 424198 | Unaffected              | 23,296,111  | 23,287,439                         | 17,729,792                          | 17,861,743               |
| 424379 | Unaffected              | 19,665,248  | 19,658,088                         | 15,101,602                          | 15,217,990               |
| 424439 | Unaffected              | 20,665,929  | 20,658,137                         | 15,761,365                          | 15,906,603               |
| 424207 | Affected                | 19,102,198  | 19,094,968                         | 12,531,596                          | 12,839,571               |
| 424222 | Affected                | 18,665,648  | 18,658,831                         | 13,960,980                          | 14,003,237               |
| 424225 | Affected                | 15,090,867  | 15,085,500                         | 11,827,301                          | 11,878,037               |
| 424239 | Affected                | 24,066,744  | 24,057,973                         | 17,148,124                          | 17,254,850               |
| 424246 | Affected                | 16,289,902  | 16,283,971                         | 11,993,993                          | 12,131,613               |
| 424259 | Affected                | 18,199,967  | 18,193,176                         | 13,255,515                          | 13,308,199               |
| 424266 | Affected                | 17,338,445  | 17,331,673                         | 13,155,931                          | 13,241,165               |
| 485907 | Affected                | 23,577,735  | 23,568,852                         | 18,765,289                          | 18,898,406               |
